# Supplementary material
Source: PubMed Central journal article supplement (PMC9588545)

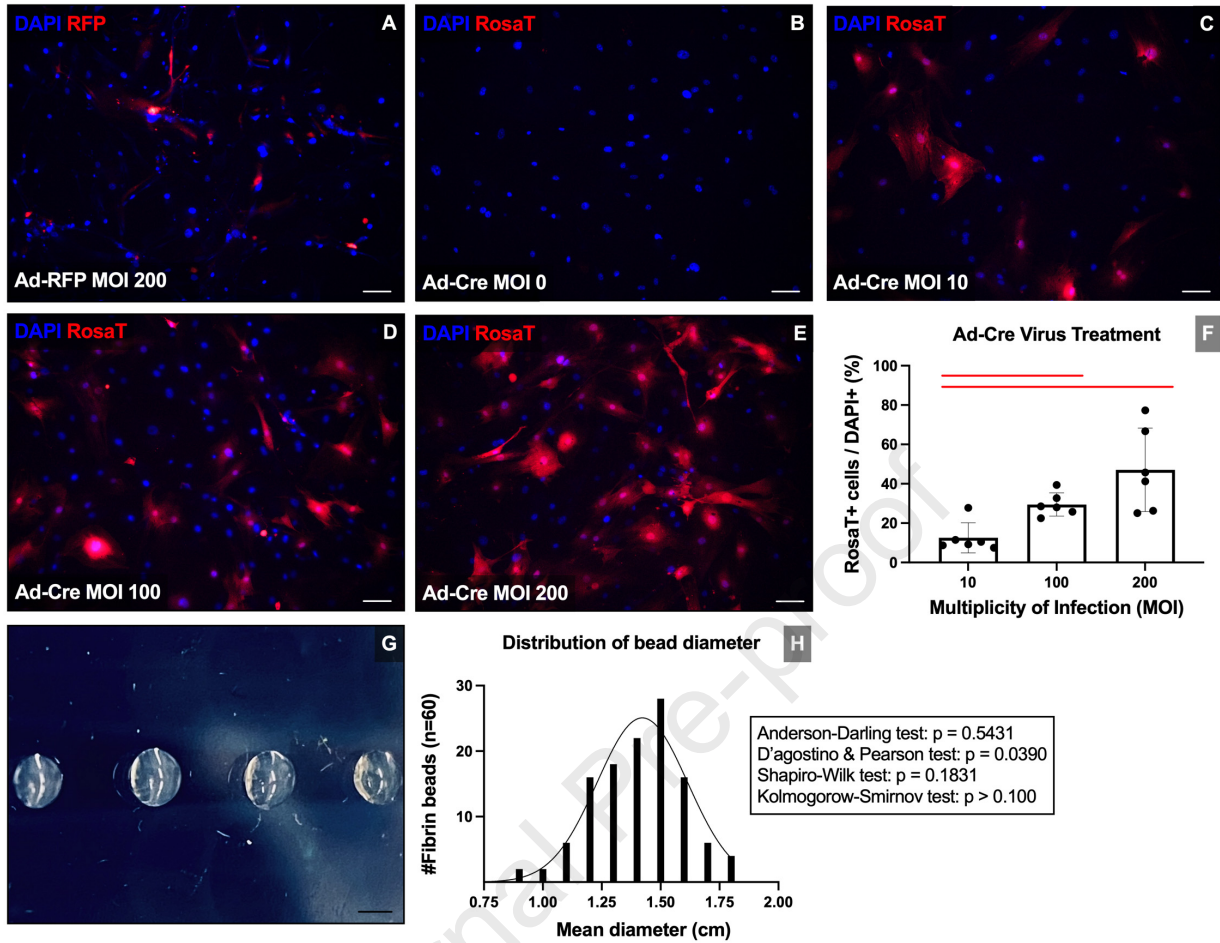

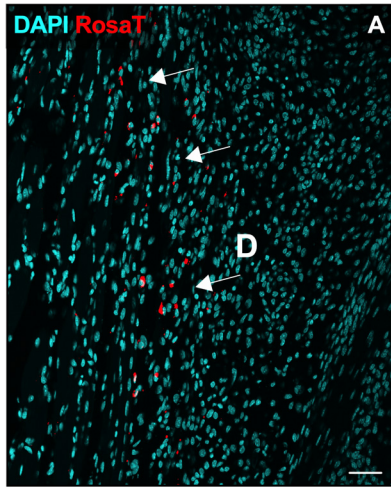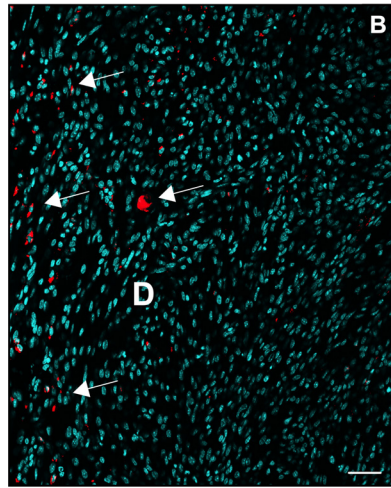

Journal Pre-proof

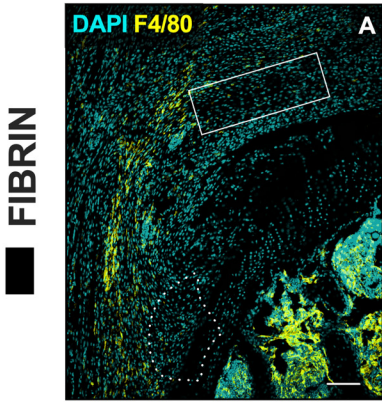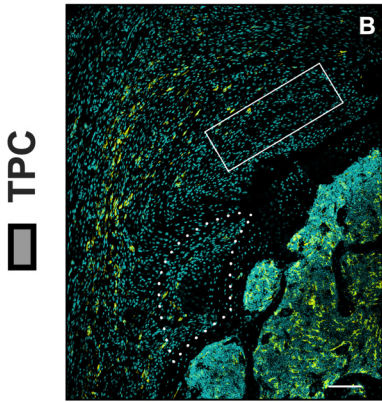

d7

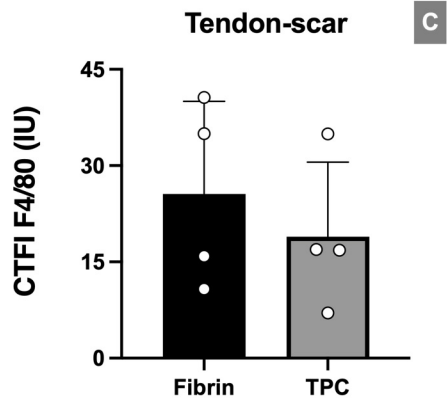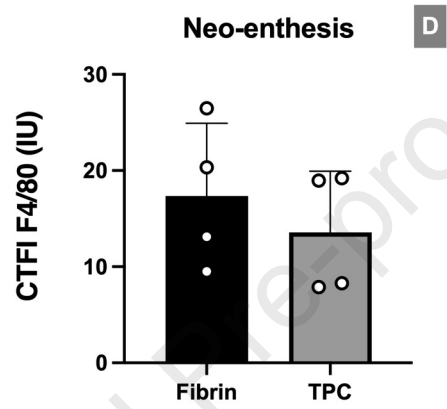

Supplement: NIHMS1814290-supplement-1.pdf [file NIHMS1814290-supplement-1.pdf]
